# Supplementary material for: STAT1 maintains naïve CD8+ T cell quiescence by suppressing the type I IFN-STAT4-mTORC1 signaling axis
Source: PubMed Central journal article supplement — Sci Adv. 2021 Sep 1;7(36):eabg8764. doi: 10.1126/sciadv.abg8764 (PMC8442933; doi:10.1126/sciadv.abg8764), 2021-09-01
Supplement: sciadv.abg8764_sm.pdf [file sciadv.abg8764_sm.pdf]

Supplementary Materials for

**STAT1 maintains naïve CD8<sup>+</sup> T cell quiescence by suppressing the type I  
IFN-STAT4-mTORC1 signaling axis**

Yoon-Chul Kye, Gil-Woo Lee, Sung-Woo Lee, Young-Jun Ju, Hee-Ok Kim, Cheol-Heui Yun\*, Jae-Ho Cho\*

\*Corresponding author. Email: cyun@snu.ac.kr (C.-H.Y.); jh\_cho@chonnam.ac.kr (J.-H.C.)

Published 1 September 2021, *Sci. Adv.* 7, eabg8764 (2021)  
DOI: 10.1126/sciadv.abg8764

**This PDF file includes:**

Figs. S1 to S4

## SUPPLEMENTARY FIGURES

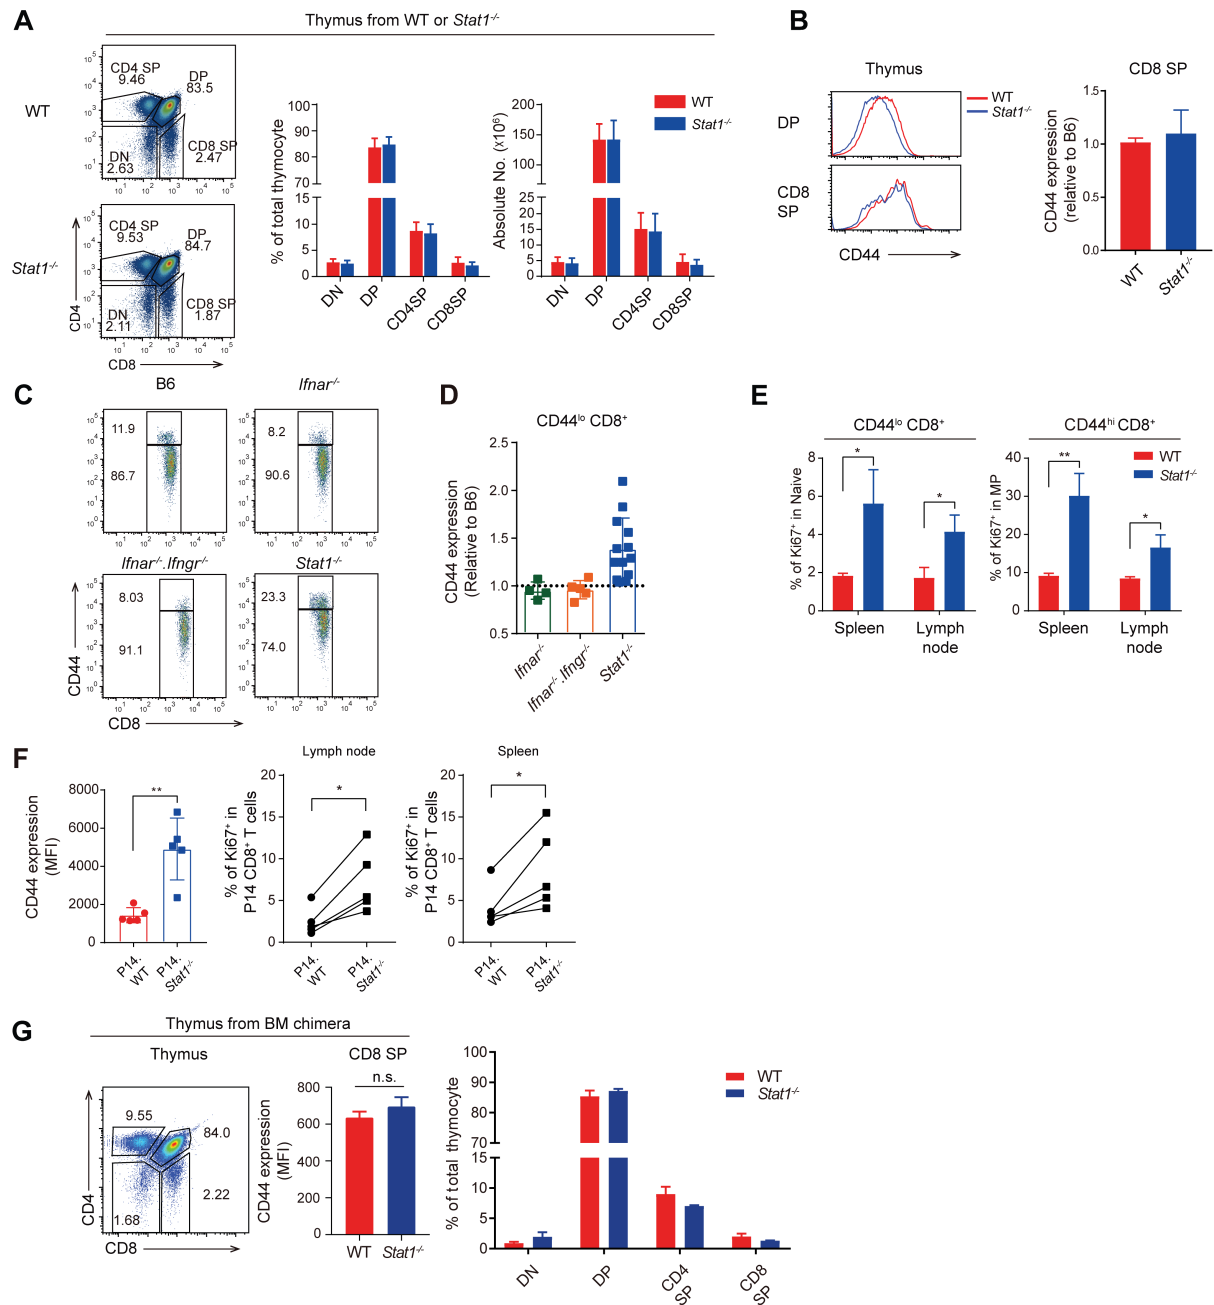

**Figure S1. Effect of *Stat1* deficiency on thymic T cell development. (A)** Flow cytometry for CD4 and CD8 expression on thymocytes from WT and *Stat1*<sup>-/-</sup> mice. Bar graphs show percentage and absolute cell number of CD4<sup>-</sup>CD8<sup>-</sup> double-negative (DN), CD4<sup>+</sup>CD8<sup>+</sup> double-positive (DP), CD4<sup>+</sup>CD8<sup>-</sup> and CD4<sup>-</sup>CD8<sup>+</sup> single-positive (SP) thymocytes. **(B)** CD44 expression in CD4<sup>-</sup>CD8<sup>+</sup> SP thymocytes from WT and *Stat1*<sup>-/-</sup> mice. **(C)** Flow cytometry for

CD44<sup>lo</sup> and CD44<sup>hi</sup> CD8<sup>+</sup> T cells and **(D)** relative level of CD44 expression in CD44<sup>lo</sup> CD8<sup>+</sup> T cells from WT, *Ifnar*<sup>-/-</sup>, *Ifnar*<sup>-/-</sup>.*Ifngr*<sup>-/-</sup>, and *Stat1*<sup>-/-</sup> mice. **(E)** Percentage of Ki67<sup>+</sup> cells in CD44<sup>lo</sup> and CD44<sup>hi</sup> CD8<sup>+</sup> T cells from WT and *Stat1*<sup>-/-</sup> mice. **(F)** Level of CD44 and percentage of Ki67<sup>+</sup> cells in P14 CD44<sup>lo</sup> CD8<sup>+</sup> T cells from WT and *Stat1*<sup>-/-</sup> mice. **(G)** Flow cytometry for CD4 and CD8 expression on thymocytes derived from WT and *Stat1*<sup>-/-</sup> BM cells as in Fig. 2 A. The results are presented as the mean ± SEM. Data are representative of 3-4 independent experiments. \*,  $P < 0.05$ ; \*\*,  $P < 0.01$ .

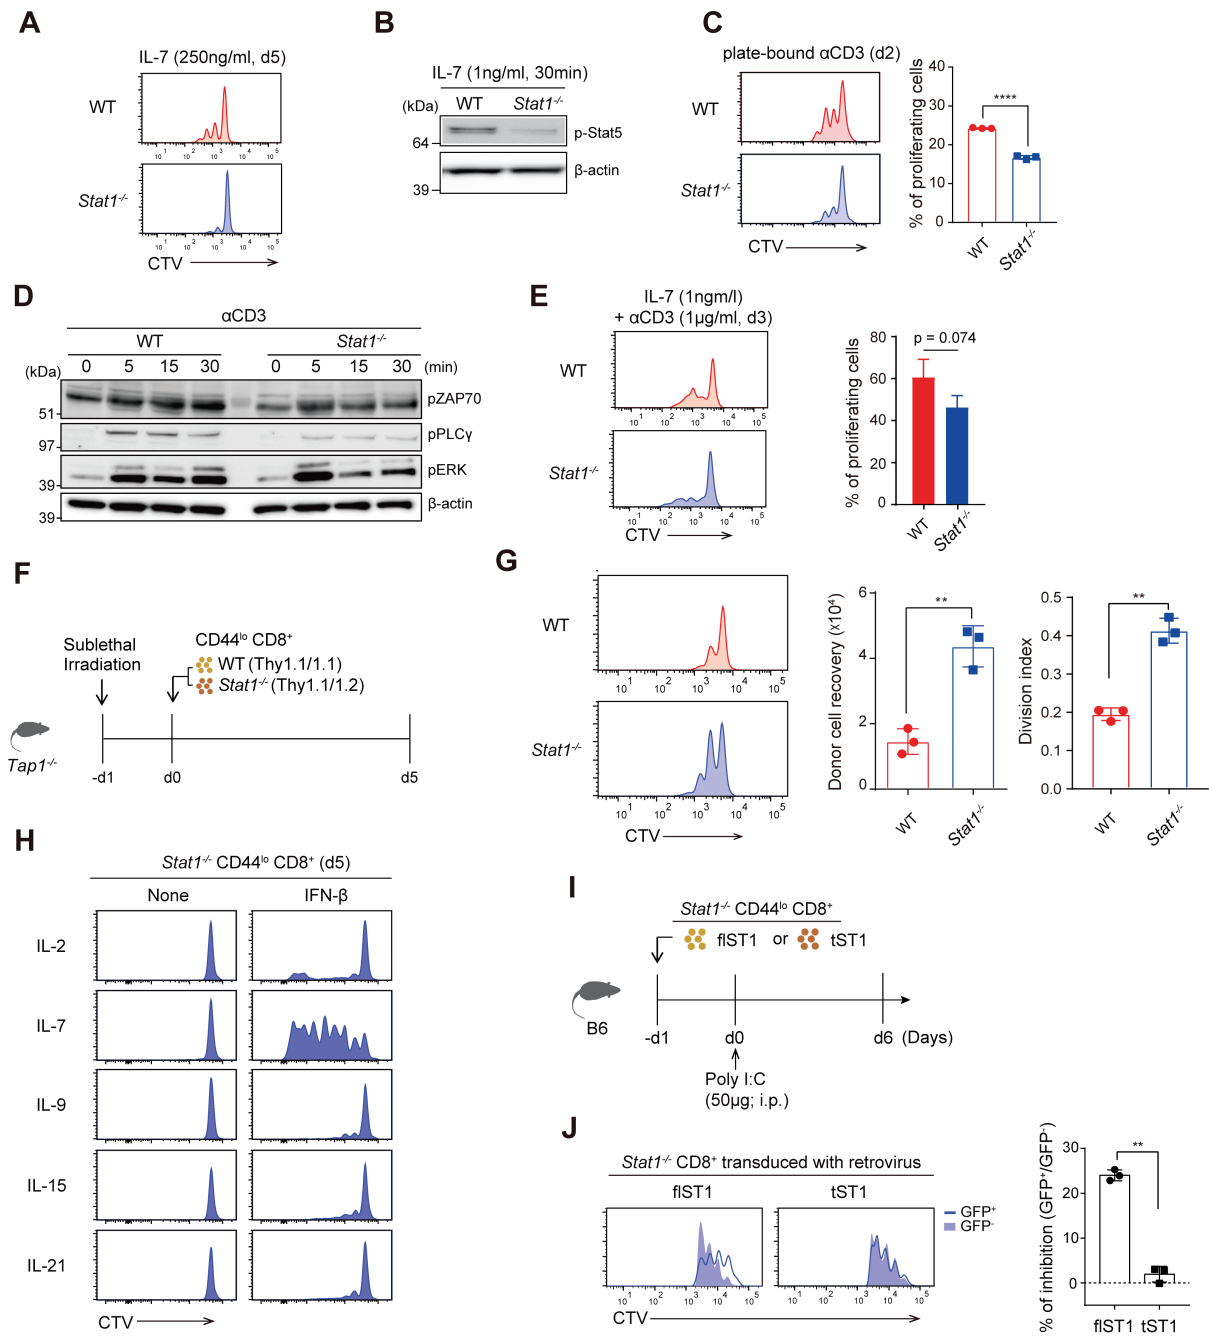

**Figure S2. Effect of Stat1 deficiency on the responsiveness to T1IFN and IL-7.** (A) *In vitro* proliferation and (B) phosphorylation of STAT5 of WT and *Stat1*<sup>-/-</sup> naïve CD8<sup>+</sup> T cells in culture with IL-7. (C) *In vitro* proliferation and (D) phosphorylation of ZAP70, PLC $\gamma$ , and ERK of WT and *Stat1*<sup>-/-</sup> naïve CD8<sup>+</sup> T cells in culture with either plate-bound for (C) or soluble  $\alpha$ CD3 for (D). (E) *In vitro* proliferation of WT and *Stat1*<sup>-/-</sup> naïve CD8<sup>+</sup> T cells in culture with IL-7 and soluble  $\alpha$ CD3. (F) Experimental scheme for adoptive transfer and (G) *in vivo* proliferation of WT and *Stat1*<sup>-/-</sup> CD8<sup>+</sup> donor cells from irradiated (500 cGy) *Tap1*<sup>-/-</sup> recipients.

**(H)** *In vitro* proliferation of WT and *Stat1*<sup>-/-</sup> naïve CD8<sup>+</sup> T cells in culture with the indicated cytokines. **(I)** Experimental scheme for adoptive transfer with retroviral transduced cells as in Fig. 4 A. **(J)** *In vivo* proliferation of *Stat1*<sup>-/-</sup> CD8<sup>+</sup> donor cells transduced with retroviral vectors encoding either full-length (fl) or truncated (t) construct of *Stat1* gene in poly I:C-treated B6 recipient mice. The results are presented as the mean ± SEM. Data are representative of 3-4 independent experiments. \*\*,  $P < 0.01$ ; \*\*\*,  $P < 0.0001$ .

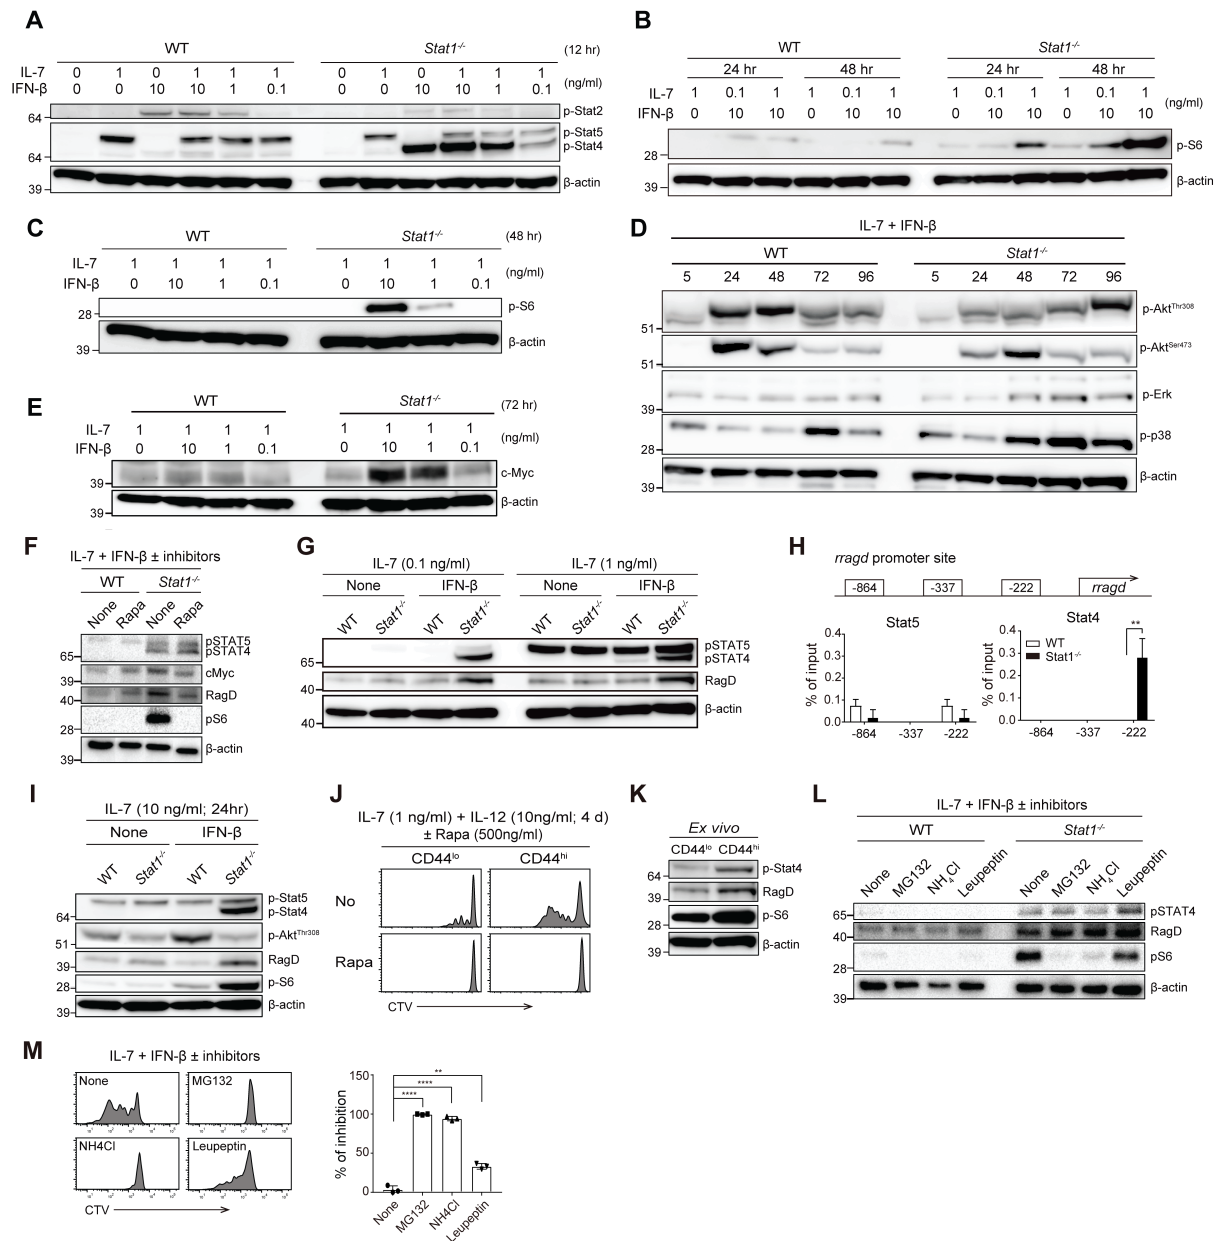

**Figure S3. Effect of Stat1 deficiency on T1IFN and IL-7 signaling.** (A) Phosphorylation of STAT2, STAT4, and STAT5, (B, C) S6, and (D) AKT, ERK, and p38 in WT and *Stat1*<sup>-/-</sup> naïve CD8<sup>+</sup> T cells after culture with various concentrations of IL-7 and IFN- $\beta$  for the indicated time points. (E) Expression of c-Myc and (F, G) RagD in WT and *Stat1*<sup>-/-</sup> naïve CD8<sup>+</sup> T cells after culture with various indicated conditions. (H) ChIP assay for STAT4 and STAT5 binding to the indicated promoter regions of *rragd* gene analyzed in WT and *Stat1*<sup>-/-</sup> CD8<sup>+</sup> T cells after culture with IL-7 and IFN- $\beta$  for 2 days. (I) Immunoblotting for the various indicated signaling proteins in WT and *Stat1*<sup>-/-</sup> CD8<sup>+</sup> T cells after culture with IL-7 and IFN- $\beta$ . (J) *In vitro*

proliferation of CD44<sup>hi</sup> and CD44<sup>lo</sup> B6 CD8<sup>+</sup> T cells after 4 days culture with IL-7 and IL-12 in the absence or presence of rapamycin. **(K, L)** Immunoblotting for phosphorylated STAT4 and S6 and of RagD expression **(K)** in freshly isolated *ex vivo* CD44<sup>hi</sup> and CD44<sup>lo</sup> B6 CD8<sup>+</sup> T cells, and **(L)** in WT and *Stat1*<sup>-/-</sup> CD8<sup>+</sup> T cells after culture with IL-7 and IFN- $\beta$  in the absence and presence of the indicated inhibitors. **(M)** *In vitro* proliferation of *Stat1*<sup>-/-</sup> naïve CD8<sup>+</sup> T cells after culture with IL-7 and IFN- $\beta$  in the presence of the indicated inhibitors. The results are presented as the mean  $\pm$  SEM. Data are representative of 3-4 independent experiments. Statistical significance is calculated using unpaired t-test. \*\*,  $P < 0.01$ ; \*\*\*\*,  $P < 0.0001$ .

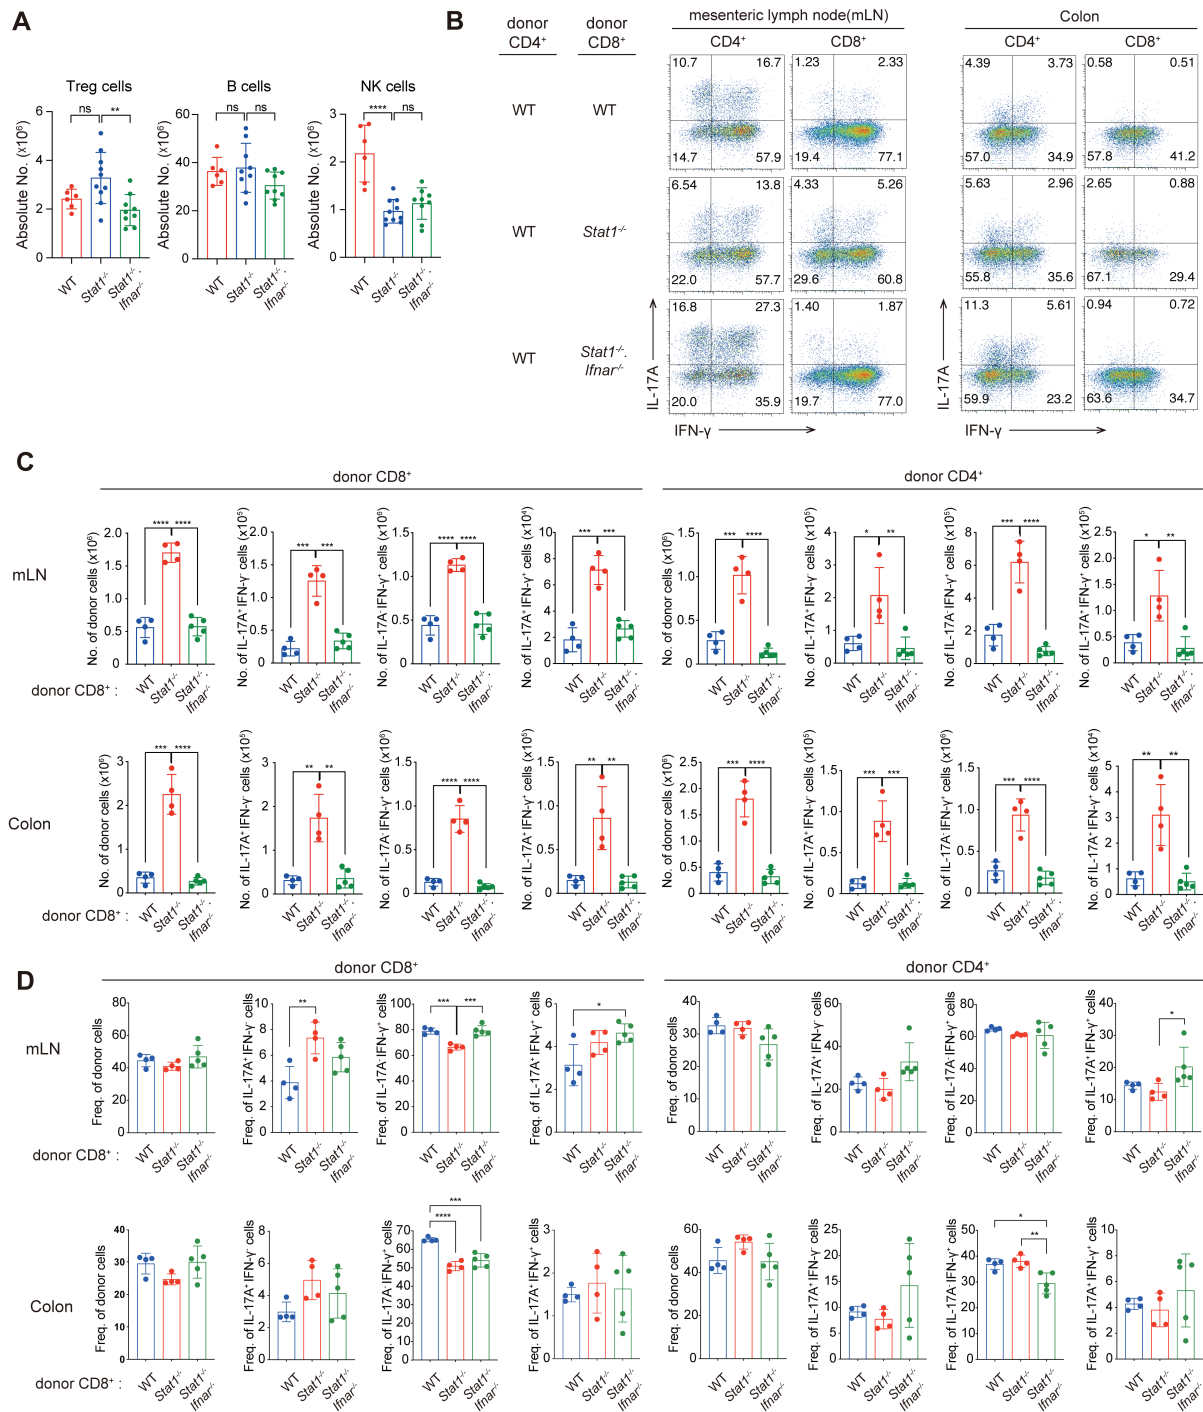

**Figure S4. Pathologic nature of STAT1-deficient T cells in an IBD setting. (A)** Absolute number of CD4<sup>+</sup> T regulatory cells (Treg; CD25<sup>+</sup>Foxp3<sup>+</sup>), B cells (B220<sup>+</sup>), and NK cells (NK1.1<sup>+</sup>) from WT, *Stat1*<sup>-/-</sup>, and *Stat1*<sup>-/-</sup>.*Ifnar*<sup>-/-</sup> mice as in Fig. 5 A-D. **(B)** Flow cytometry and **(C)** absolute cell number and **(D)** percentage for intracellular IL-17A and IFN- $\gamma$  production from donor CD4<sup>+</sup> (from WT) and CD8<sup>+</sup> T cells (from WT, *Stat1*<sup>-/-</sup>, or *Stat1*<sup>-/-</sup>.*Ifnar*<sup>-/-</sup> mice) adoptively transferred into *Rag1*<sup>-/-</sup> recipient mice as in Fig. 5 E. The results are presented as



the mean  $\pm$  SD. Data are representative of 3-4 independent experiments. Statistical significance is calculated using unpaired t-test and two-way ANOVA multiple comparisons. \*,  $P < 0.05$ ; \*\*,  $P < 0.01$ ; \*\*\*,  $P < 0.001$ ; \*\*\*\*,  $P < 0.0001$ .
